# Supplementary material for: Angiopoietin-2 Is Critical for Cytokine-Induced Vascular Leakage
Source: PubMed Central journal article supplement (PMC3734283; doi:10.1371/journal.pone.0070459), 2013-08-05
Supplement: pone.0070459.s002.pdf [file pone.0070459.s002.pdf]

## Benest et al., Supplementary Figure S2

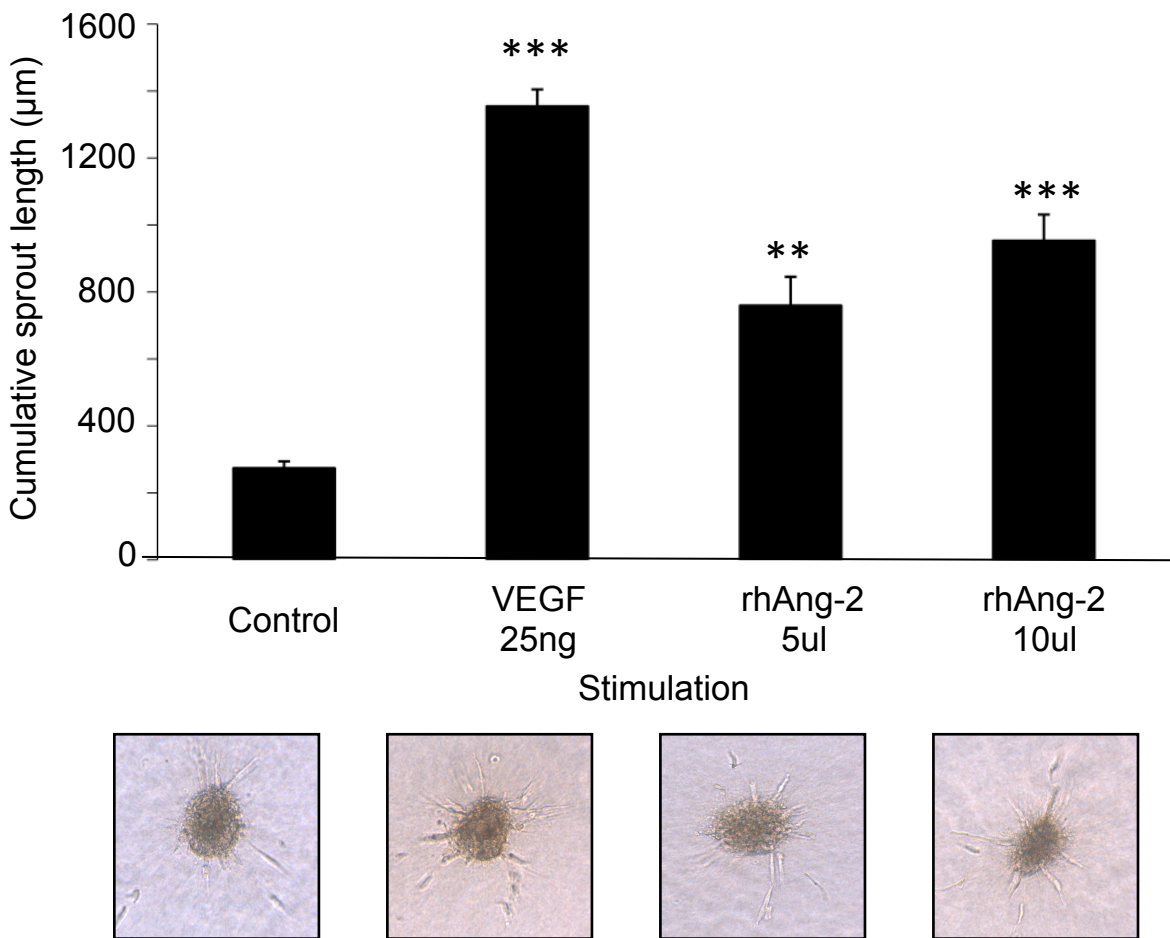

**Supplementary Figure S2:** Spheroid-based endothelial sprouting angiogenesis assay demonstrating the bioactivity of baculovirus-produced Ang-2. VEGF served as positive control. \*\*  $p < 0.01$ , \*\*\*  $p < 0.001$  compared to control.
