# Supplementary material for: Angiopoietin-2 Is Critical for Cytokine-Induced Vascular Leakage
Source: PubMed Central journal article supplement (PMC3734283; doi:10.1371/journal.pone.0070459), 2013-08-05
Supplement: pone.0070459.s003.pdf [file pone.0070459.s003.pdf]

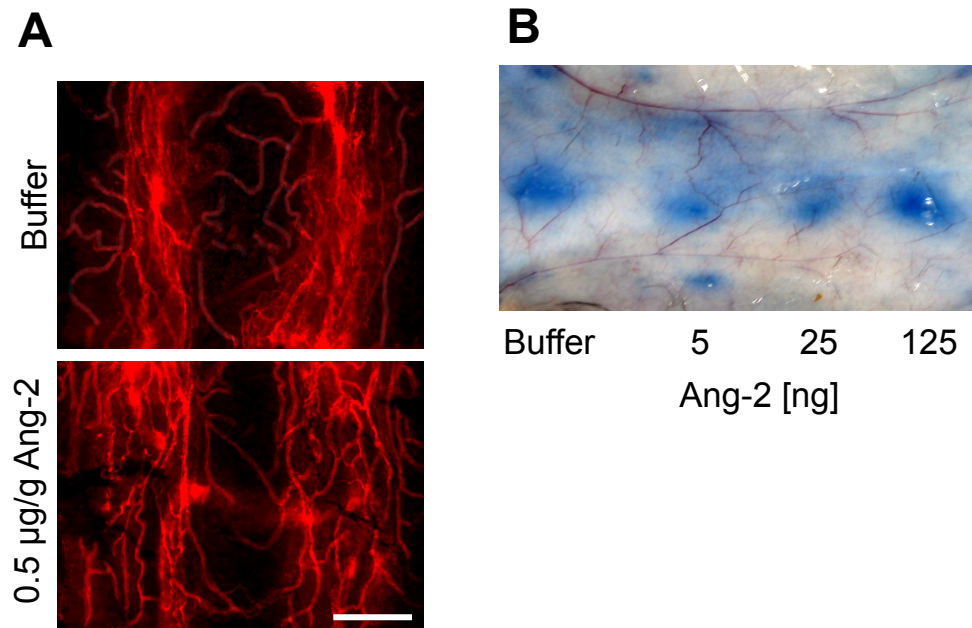

**Supplementary Figure S3:** Representative images of CD31-stained tracheal vasculatures (**A**) and Miles' Assay (**B**) following rhAng-2 administration. Scale bar 100  $\mu\text{m}$ .
